# Supplementary material for: Differential privacy for eye tracking with temporal correlations
Source: PubMed Central journal article supplement (PMC8370645; doi:10.1371/journal.pone.0255979), 2021-08-17
Supplement: pone.0255979.s001.pdf [file pone.0255979.s001.pdf]

S1 Table. Document type classification accuracies in the MPIIDPEye dataset using differentially private eye movement features without majority voting.

| Method    | Document type classification accuracies (k-NN SVM DT RF) |      |      |      |                  |      |      |      |                  |      |      |      |                 |      |      |      |                 |      |      |      |
|-----------|----------------------------------------------------------|------|------|------|------------------|------|------|------|------------------|------|------|------|-----------------|------|------|------|-----------------|------|------|------|
|           | $\epsilon = 0.48$                                        |      |      |      | $\epsilon = 2.4$ |      |      |      | $\epsilon = 4.8$ |      |      |      | $\epsilon = 24$ |      |      |      | $\epsilon = 48$ |      |      |      |
| FPA       | 0.46                                                     | 0.52 | 0.68 | 0.73 | 0.46             | 0.52 | 0.67 | 0.73 | 0.45             | 0.51 | 0.67 | 0.73 | 0.46            | 0.52 | 0.68 | 0.73 | 0.47            | 0.52 | 0.68 | 0.74 |
| CFPA-32   | 0.34                                                     | 0.35 | 0.36 | 0.38 | 0.34             | 0.35 | 0.36 | 0.38 | 0.34             | 0.36 | 0.36 | 0.38 | 0.39            | 0.44 | 0.38 | 0.42 | 0.47            | 0.53 | 0.44 | 0.49 |
| CFPA-64   | 0.34                                                     | 0.35 | 0.36 | 0.38 | 0.34             | 0.35 | 0.36 | 0.38 | 0.34             | 0.36 | 0.36 | 0.38 | 0.39            | 0.44 | 0.38 | 0.42 | 0.47            | 0.53 | 0.44 | 0.49 |
| CFPA-128  | 0.34                                                     | 0.34 | 0.36 | 0.39 | 0.34             | 0.34 | 0.36 | 0.39 | 0.34             | 0.34 | 0.36 | 0.39 | 0.38            | 0.42 | 0.37 | 0.42 | 0.46            | 0.51 | 0.43 | 0.48 |
| DCFPA-32  | 0.36                                                     | 0.35 | 0.36 | 0.37 | 0.36             | 0.34 | 0.35 | 0.37 | 0.35             | 0.34 | 0.36 | 0.37 | 0.36            | 0.35 | 0.35 | 0.37 | 0.35            | 0.34 | 0.36 | 0.38 |
| DCFPA-64  | 0.38                                                     | 0.37 | 0.35 | 0.37 | 0.37             | 0.35 | 0.35 | 0.37 | 0.37             | 0.36 | 0.35 | 0.37 | 0.37            | 0.36 | 0.35 | 0.37 | 0.37            | 0.36 | 0.35 | 0.37 |
| DCFPA-128 | 0.40                                                     | 0.38 | 0.36 | 0.38 | 0.39             | 0.37 | 0.35 | 0.37 | 0.41             | 0.39 | 0.35 | 0.38 | 0.38            | 0.37 | 0.35 | 0.38 | 0.39            | 0.37 | 0.35 | 0.38 |
