# Supplementary material for: Differential privacy for eye tracking with temporal correlations
Source: PubMed Central journal article supplement (PMC8370645; doi:10.1371/journal.pone.0255979), 2021-08-17
Supplement: pone.0255979.s002.pdf [file pone.0255979.s002.pdf]

**S2 Table. Gender classification accuracies in the MPIIDPEye dataset using differentially private eye movement features without majority voting.**

| Gender classification accuracies (k-NN SVM DT RF) |                   |      |      |      |                  |      |      |      |                  |      |      |      |                 |      |      |      |                 |      |      |      |
|---------------------------------------------------|-------------------|------|------|------|------------------|------|------|------|------------------|------|------|------|-----------------|------|------|------|-----------------|------|------|------|
| Method                                            | $\epsilon = 0.48$ |      |      |      | $\epsilon = 2.4$ |      |      |      | $\epsilon = 4.8$ |      |      |      | $\epsilon = 24$ |      |      |      | $\epsilon = 48$ |      |      |      |
| FPA                                               | 0.48              | 0.42 | 0.48 | 0.45 | 0.48             | 0.42 | 0.47 | 0.44 | 0.47             | 0.41 | 0.47 | 0.45 | 0.47            | 0.41 | 0.48 | 0.44 | 0.48            | 0.43 | 0.48 | 0.45 |
| CFPA-32                                           | 0.43              | 0.31 | 0.44 | 0.40 | 0.43             | 0.31 | 0.45 | 0.41 | 0.43             | 0.32 | 0.46 | 0.41 | 0.46            | 0.42 | 0.49 | 0.47 | 0.51            | 0.47 | 0.53 | 0.53 |
| CFPA-64                                           | 0.44              | 0.35 | 0.45 | 0.40 | 0.44             | 0.35 | 0.45 | 0.41 | 0.44             | 0.35 | 0.46 | 0.42 | 0.46            | 0.43 | 0.49 | 0.47 | 0.51            | 0.48 | 0.54 | 0.53 |
| CFPA-128                                          | 0.45              | 0.39 | 0.46 | 0.42 | 0.45             | 0.38 | 0.46 | 0.42 | 0.45             | 0.38 | 0.46 | 0.42 | 0.46            | 0.43 | 0.49 | 0.47 | 0.51            | 0.47 | 0.53 | 0.53 |
| DCFPA-32                                          | 0.44              | 0.27 | 0.45 | 0.42 | 0.44             | 0.27 | 0.45 | 0.42 | 0.44             | 0.27 | 0.45 | 0.42 | 0.44            | 0.27 | 0.45 | 0.42 | 0.44            | 0.27 | 0.46 | 0.42 |
| DCFPA-64                                          | 0.44              | 0.30 | 0.46 | 0.43 | 0.43             | 0.29 | 0.46 | 0.43 | 0.44             | 0.30 | 0.46 | 0.43 | 0.43            | 0.30 | 0.46 | 0.43 | 0.43            | 0.30 | 0.46 | 0.43 |
| DCFPA-128                                         | 0.44              | 0.32 | 0.46 | 0.43 | 0.44             | 0.32 | 0.46 | 0.43 | 0.44             | 0.32 | 0.47 | 0.43 | 0.44            | 0.31 | 0.46 | 0.43 | 0.44            | 0.32 | 0.47 | 0.43 |
