# Supplementary material for: Differential privacy for eye tracking with temporal correlations
Source: PubMed Central journal article supplement (PMC8370645; doi:10.1371/journal.pone.0255979), 2021-08-17
Supplement: pone.0255979.s003.pdf [file pone.0255979.s003.pdf]

S3 Table. Person identification accuracies in the MPIIDPEye dataset using differentially private eye movement features without majority voting.

| Person identification accuracies (k-NN SVM DT RF) |                   |      |      |                  |      |      |                  |      |      |                 |      |      |                 |      |      |      |      |      |      |      |
|---------------------------------------------------|-------------------|------|------|------------------|------|------|------------------|------|------|-----------------|------|------|-----------------|------|------|------|------|------|------|------|
| Method                                            | $\epsilon = 0.48$ |      |      | $\epsilon = 2.4$ |      |      | $\epsilon = 4.8$ |      |      | $\epsilon = 24$ |      |      | $\epsilon = 48$ |      |      |      |      |      |      |      |
| FPA                                               | 1                 | 1    | 0.98 | 1                | 1    | 1    | 0.98             | 1    | 1    | 1               | 0.98 | 1    | 1               | 1    | 0.97 | 1    | 1    | 1    | 0.95 | 1    |
| CFPA-32                                           | 0.09              | 0.11 | 0.16 | 0.16             | 0.08 | 0.11 | 0.16             | 0.17 | 0.09 | 0.11            | 0.17 | 0.17 | 0.12            | 0.15 | 0.18 | 0.21 | 0.18 | 0.21 | 0.23 | 0.27 |
| CFPA-64                                           | 0.09              | 0.11 | 0.17 | 0.17             | 0.09 | 0.11 | 0.17             | 0.17 | 0.09 | 0.11            | 0.17 | 0.17 | 0.12            | 0.15 | 0.19 | 0.21 | 0.17 | 0.21 | 0.23 | 0.27 |
| CFPA-128                                          | 0.11              | 0.13 | 0.17 | 0.18             | 0.11 | 0.13 | 0.17             | 0.18 | 0.11 | 0.13            | 0.17 | 0.18 | 0.13            | 0.16 | 0.18 | 0.20 | 0.18 | 0.20 | 0.21 | 0.25 |
| DCFPA-32                                          | 0.09              | 0.10 | 0.15 | 0.16             | 0.09 | 0.11 | 0.14             | 0.16 | 0.09 | 0.11            | 0.14 | 0.16 | 0.09            | 0.11 | 0.14 | 0.16 | 0.09 | 0.11 | 0.15 | 0.16 |
| DCFPA-64                                          | 0.09              | 0.10 | 0.13 | 0.15             | 0.09 | 0.10 | 0.13             | 0.15 | 0.09 | 0.10            | 0.13 | 0.15 | 0.09            | 0.10 | 0.13 | 0.15 | 0.09 | 0.10 | 0.13 | 0.15 |
| DCFPA-128                                         | 0.08              | 0.09 | 0.12 | 0.13             | 0.08 | 0.09 | 0.11             | 0.13 | 0.08 | 0.09            | 0.11 | 0.13 | 0.08            | 0.09 | 0.12 | 0.13 | 0.08 | 0.09 | 0.11 | 0.13 |
