# Supplementary material for: Differential privacy for eye tracking with temporal correlations
Source: PubMed Central journal article supplement (PMC8370645; doi:10.1371/journal.pone.0255979), 2021-08-17
Supplement: pone.0255979.s004.pdf [file pone.0255979.s004.pdf]

S4 Table. Person identification classification accuracies in the MPIIPrivacEye dataset using differentially private eye movement features without majority voting.

Person identification classification accuracies (k-NN|SVM|DT|RF)

| Method    | $\epsilon = 0.48$   | $\epsilon = 2.4$    | $\epsilon = 4.8$    | $\epsilon = 24$     | $\epsilon = 48$     |
|-----------|---------------------|---------------------|---------------------|---------------------|---------------------|
| FPA       | 1 1 0.99 1          | 1 1 0.99 1          | 1 1 0.99 1          | 1 1 0.97 1          | 1 1 0.94 1          |
| CFPA-32   | 0.06 0.07 0.06 0.06 | 0.06 0.07 0.06 0.06 | 0.06 0.07 0.06 0.06 | 0.07 0.09 0.07 0.07 | 0.08 0.10 0.08 0.08 |
| CFPA-64   | 0.06 0.07 0.06 0.06 | 0.06 0.07 0.06 0.06 | 0.06 0.07 0.06 0.06 | 0.07 0.09 0.07 0.07 | 0.08 0.10 0.07 0.08 |
| CFPA-128  | 0.06 0.08 0.06 0.07 | 0.06 0.08 0.06 0.07 | 0.06 0.08 0.06 0.07 | 0.07 0.09 0.07 0.08 | 0.08 0.11 0.07 0.08 |
| DCFPA-32  | 0.06 0.07 0.06 0.06 | 0.06 0.07 0.06 0.06 | 0.06 0.07 0.06 0.06 | 0.06 0.07 0.06 0.06 | 0.06 0.07 0.06 0.06 |
| DCFPA-64  | 0.06 0.06 0.06 0.06 | 0.06 0.06 0.06 0.06 | 0.06 0.06 0.06 0.06 | 0.06 0.06 0.06 0.06 | 0.06 0.07 0.06 0.06 |
| DCFPA-128 | 0.06 0.06 0.06 0.06 | 0.06 0.06 0.06 0.06 | 0.06 0.06 0.06 0.06 | 0.06 0.06 0.06 0.06 | 0.06 0.06 0.06 0.06 |
